# Supplementary material for: Preparation and application of high-brightness red carbon quantum dots for pH and oxidized l-glutathione dual response
Source: Royal Society of Chemistry journal article supplement (doi:10.1039/d3an00383c), 2023-01-01
Supplement: d3an00383c1.pdf [file d3an00383c1.pdf]

## Supplementary Materials

### **Preparation and application of high-brightness red carbon quantum dots for pH and oxidized L-glutathione dual response**

Yuwei Du, <sup>a,c</sup> Lei Cao, <sup>a,c</sup> Xinlu Li, <sup>a,c</sup> TongTong Zhu, <sup>a,c</sup> Ruhong Yan, <sup>\*,b,c</sup> Wen-Fei Dong <sup>\*,a,c</sup> and Li Li <sup>\*,a,c,d</sup>

a. School of Biomedical Engineering (Suzhou), Division of Life Sciences and Medicine, University of Science and Technology of China, Hefei 230026, China.

b. Department of Clinical Laboratory, Suzhou Hospital, Affiliated Hospital of Medical School, Nanjing University, Suzhou, 215153, China.

E-mail: yrhzl@hotmail.com

c. CAS Key Laboratory of Biomedical Diagnostics, Suzhou Institute of Biomedical Engineering and Technology, Chinese Academy of Science (CAS), Suzhou, 215163, China.

E-mail: wenfeidong@sibet.ac.cn

d. Jinan Guokekeyigong Science and Technology Development Co., Ltd, Jinan, 250104, China.

E-mail: lil@sibet.ac.cn

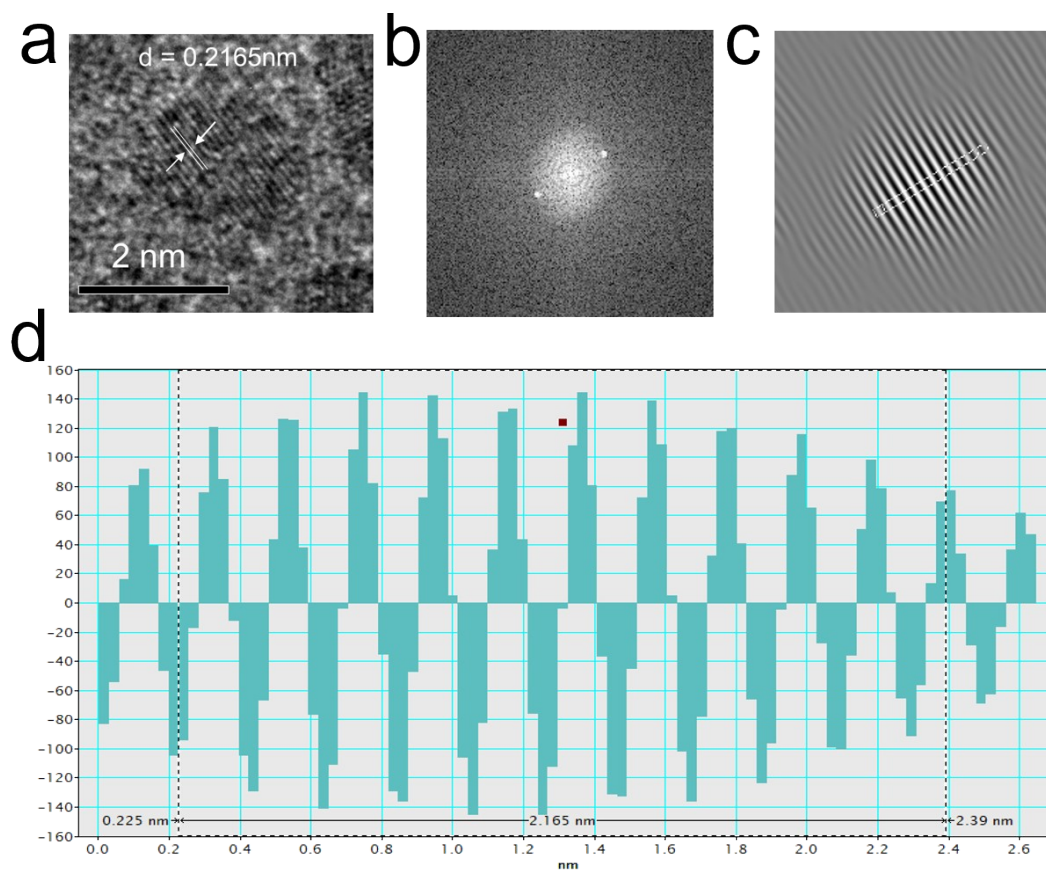

**Figure S1.** (a) HR-TEM image of the R-CDs. FFT pattern (b) and IFFT pattern (c) of the R-CDs. (d) The calculation of lattice d-spacing of the R-CDs (0.2165nm).

**Table S1.** The elemental composition and functional group percentages of the R-CDs measured by XPS.

| Atom | Atomic % | Name                   | Functional group       | Area (%) |
|------|----------|------------------------|------------------------|----------|
| C    | 63.04    | C1 s                   | C-C/C=C                | 95.26    |
|      |          |                        | C-N/C-O                | 4.74     |
| N    | 3.16     | N1 s                   | Pyridinic N            | 8.95     |
|      |          |                        | Pyrrolic N             | 56.29    |
| O    | 27.15    | O1 s                   | Graphitic N            | 34.76    |
|      |          |                        | C=O                    | 37.44    |
| Br   | 3.28     | Br 3d                  | C-O                    | 62.56    |
|      |          |                        | H-Br 3d <sub>3/2</sub> | 44.51    |
|      |          | C-Br 3d <sub>5/2</sub> | 30.98                  |          |
|      |          | C-Br 3d <sub>3/2</sub> | 24.51                  |          |

**Table S2.** The comparison of different red-emitting carbon dots synthesis precursors, synthesis method, application, the optimal emission wavelength ( $\lambda_{em}$ ), and the absolute quantum yield. The absolute quantum yield of the R-CDs is 11.93%.

| Precursors                                                                | Synthetic method | Application                      | $\lambda_{em}$ | Quantum yield | Ref.      |
|---------------------------------------------------------------------------|------------------|----------------------------------|----------------|---------------|-----------|
| Citric acid, urea                                                         | hydrothermal     | fluorescence mechanism           | 602 nm         | 4.00%         | 1         |
| 2,5-Diamino-benzenesulfonic acid, 4-aminophenylboronic acid hydrochloride | hydrothermal     | Fe <sup>3+</sup> detection, cell | 600 nm         | 5.44%         | 2         |
| Citric acid, ethylene glycol                                              | hydrothermal     | fluorescence mechanism           | 610 nm         | 6%            | 3         |
| Alizarin carmine                                                          | hydrothermal     | GSH detection, cell              | 642 nm         | 6.3%          | 4         |
| Citric acid, urea                                                         | solvothermal     | LED                              | 600 nm         | 7.40%         | 5         |
| Citric acid, urea                                                         | solvothermal     | cell                             | 658 nm         | 9.8%          | 6         |
| p-Phenylenediamine                                                        | solvothermal     | cell                             | 620 nm         | 3-10.4%       | 7         |
| 1,2-Diamino-4-bromobenzene                                                | solvothermal     | cell                             | 662 nm         | 11.93%        | This work |

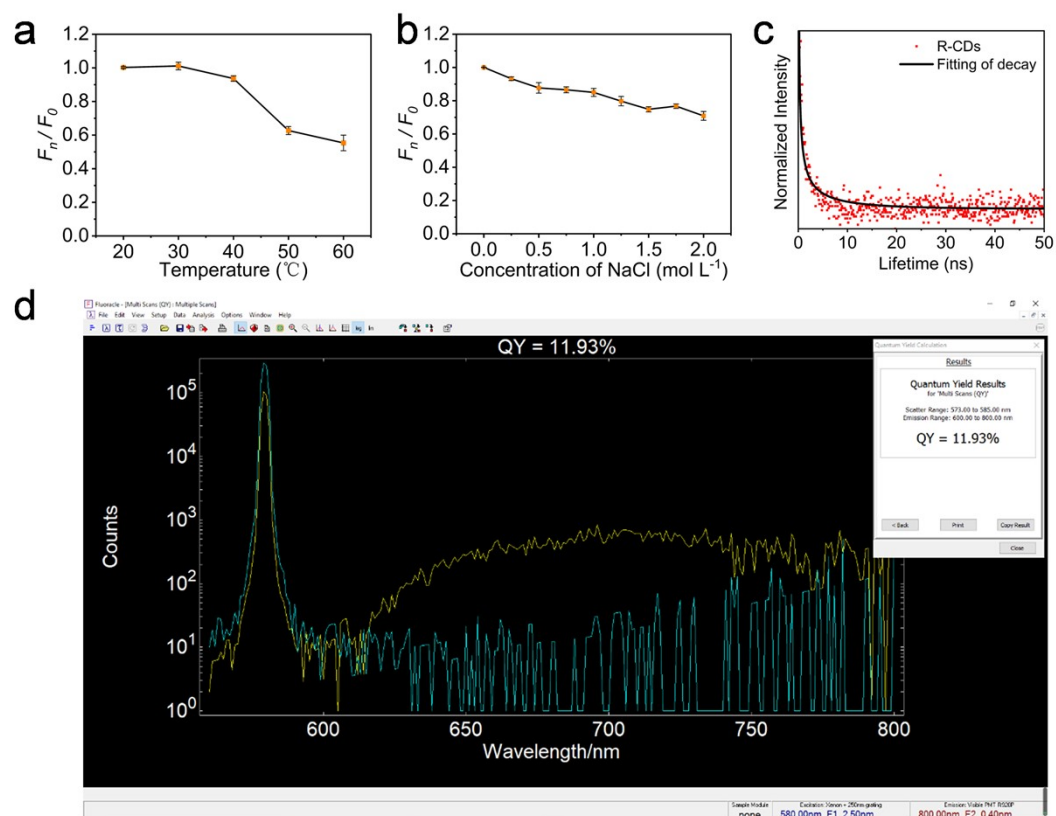

**Figure S2.** (a) Effects of different temperature on the fluorescence intensity of the R-CDs.  $F_0$  and  $F_n$  are the fluorescence intensities of the R-CDs at 20 $^{\circ}\text{C}$  and different temperature. (b) Effects of ionic strengths on the fluorescence intensity of the R-CDs.  $F_0$  and  $F_n$  are the fluorescence intensities of the R-CDs in 0  $\text{mol L}^{-1}$  and different concentrations of NaCl solution. (c) The fluorescence lifetime of the R-CDs. ( $\lambda_{\text{ex}} = 580 \text{ nm}$ ). (d) The absolute quantum yield of the R-CDs is as high as 11.93%.

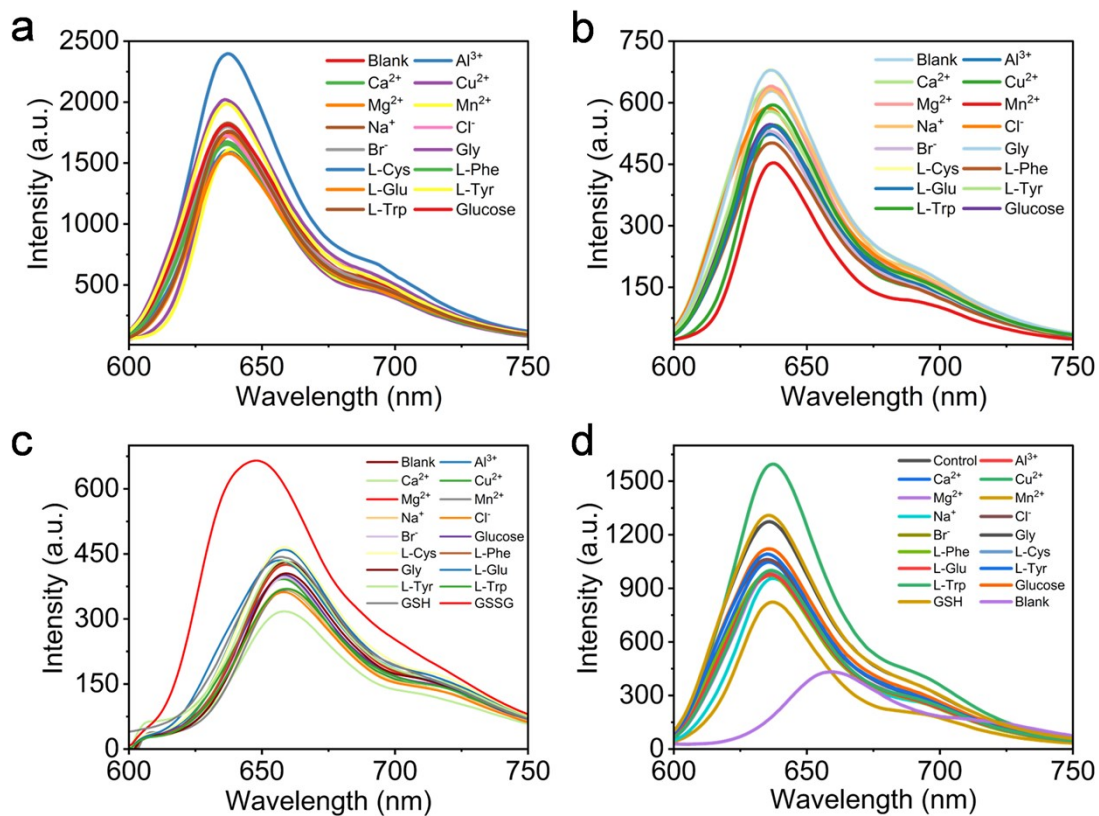

**Figure S3.** The Fluorescence spectra of the R-CDs with the addition of 0.1mM of different interfering substances (Al<sup>3+</sup>, Ca<sup>2+</sup>, Cu<sup>2+</sup>, Mg<sup>2+</sup>, Mn<sup>2+</sup>, Na<sup>+</sup>, Cl<sup>-</sup>, Br<sup>-</sup>, Glucose, L-Cys, L-Phe, Gly, L-Glu, L-Tyr, L-Trp, GSH) at pH 2.0 (a) and pH 7.0 (b). (c) The fluorescence spectra of the R-CDs with the addition of 0.1mM of different interfering substances. (d) The fluorescence spectra of the R-CDs with the addition of 0.1mM of different interfering substances or the interfering substances and GSSG.

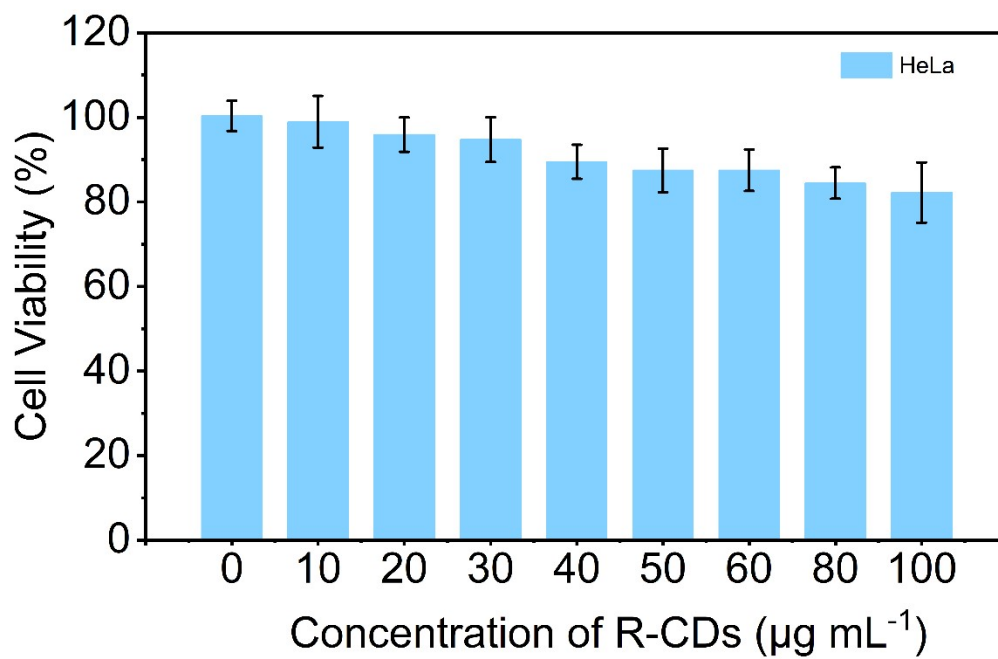

**Figure S4.** Cytotoxicity assays of the R-CDs against HeLa cells.

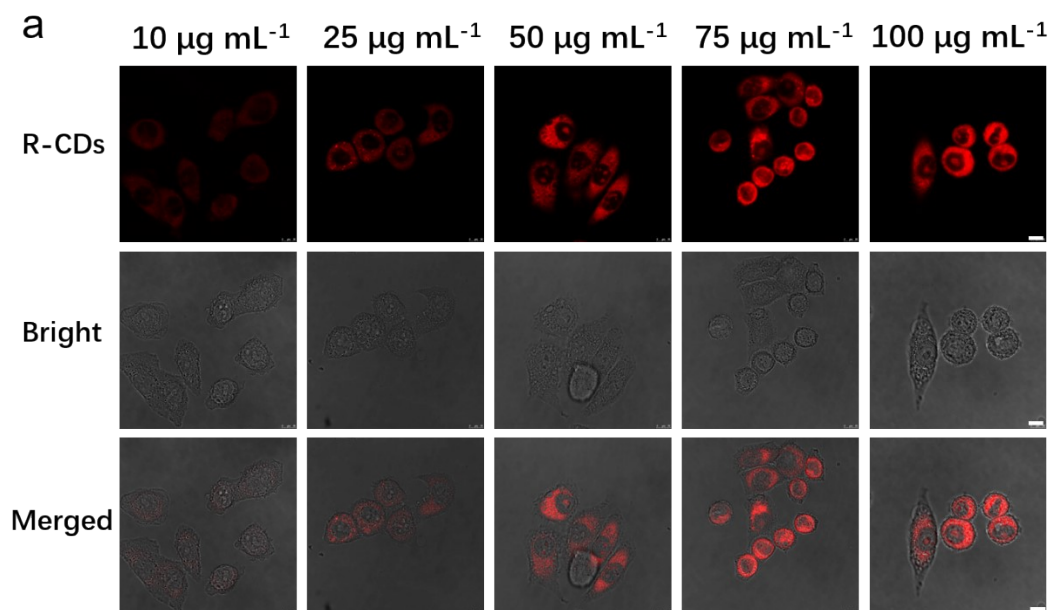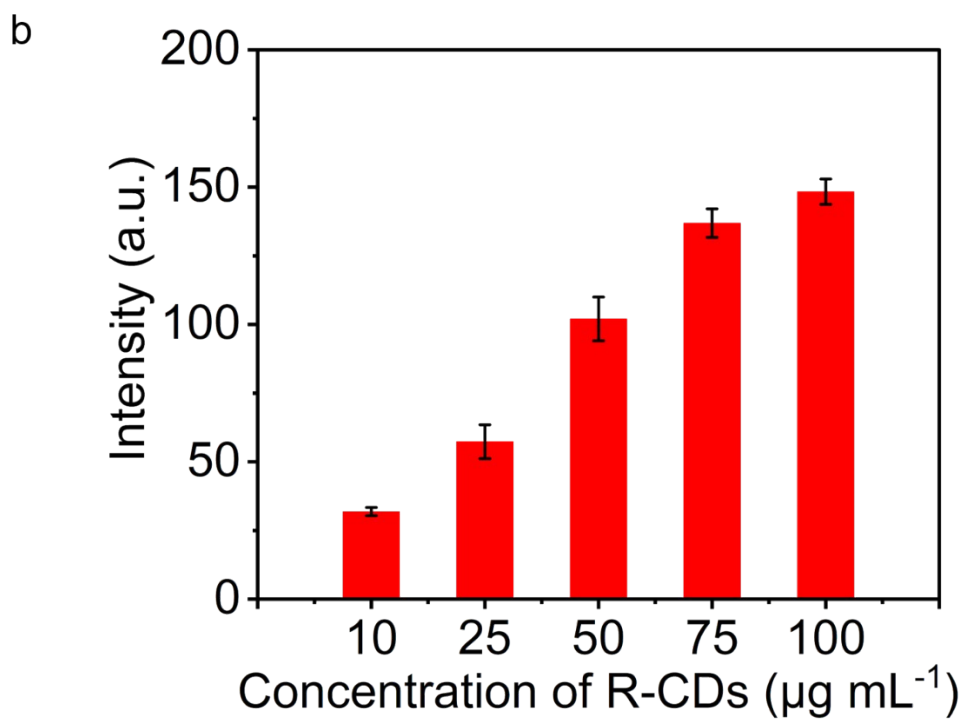

**Figure S5.** (a) The laser scanning confocal microscope images of HeLa cells co-cubated with the R-CDs at different concentrations (5, 10, 15, and 20  $\mu\text{g mL}^{-1}$ ). (b) The corresponding average fluorescence intensities from the images in (a). The scale bar is 10  $\mu\text{m}$ .



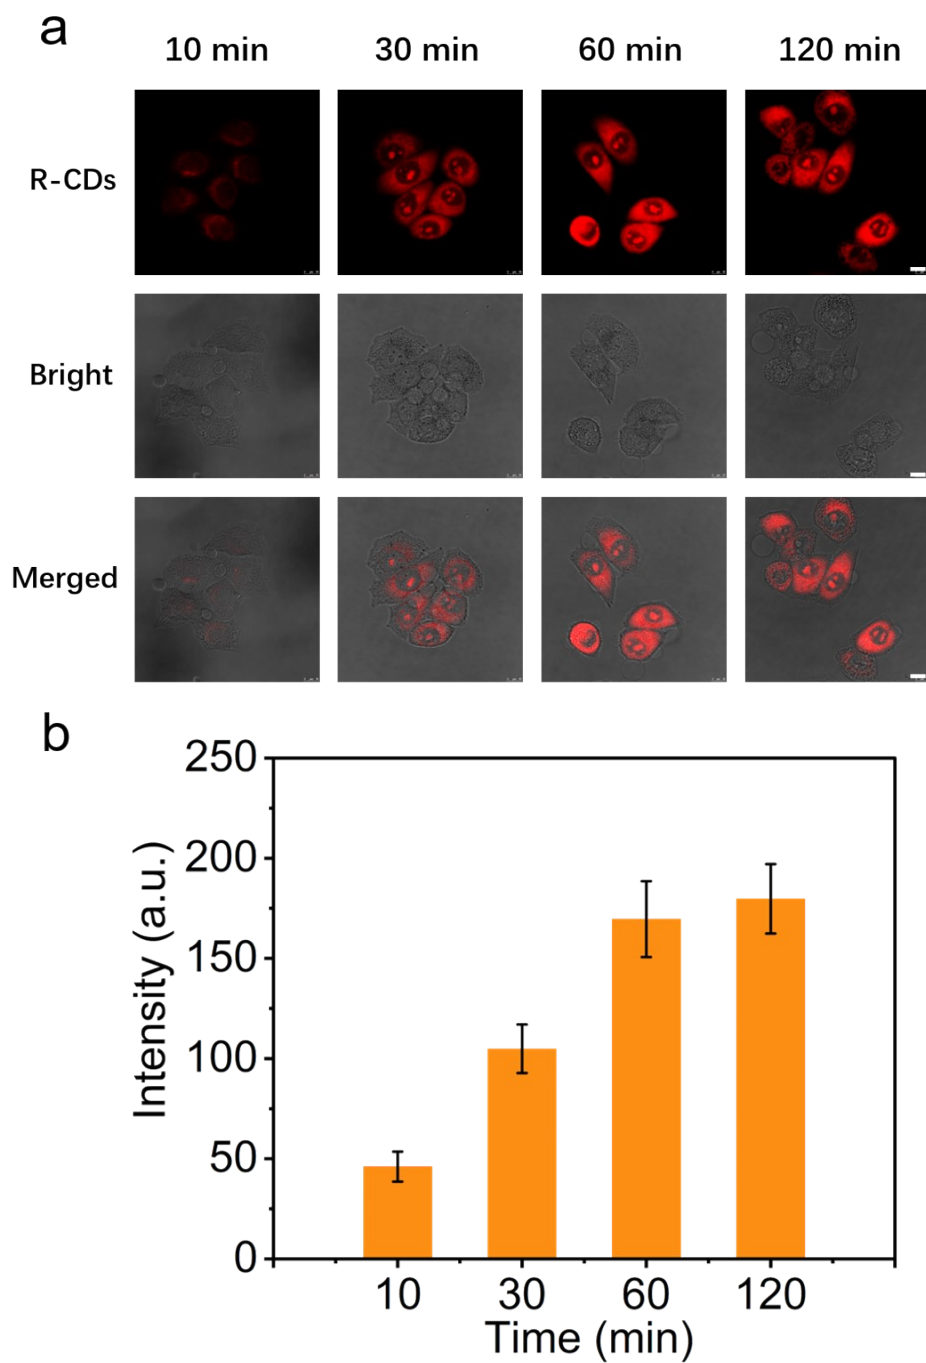

**Figure S6.** (a) The laser scanning confocal microscope images of HeLa cells co-incubated with the R-CDs ( $75 \mu\text{g mL}^{-1}$ ) for 10, 30, 60, and 120 min. (b) The corresponding average fluorescence intensities from the images in (a). The scale bar is  $10 \mu\text{m}$ .

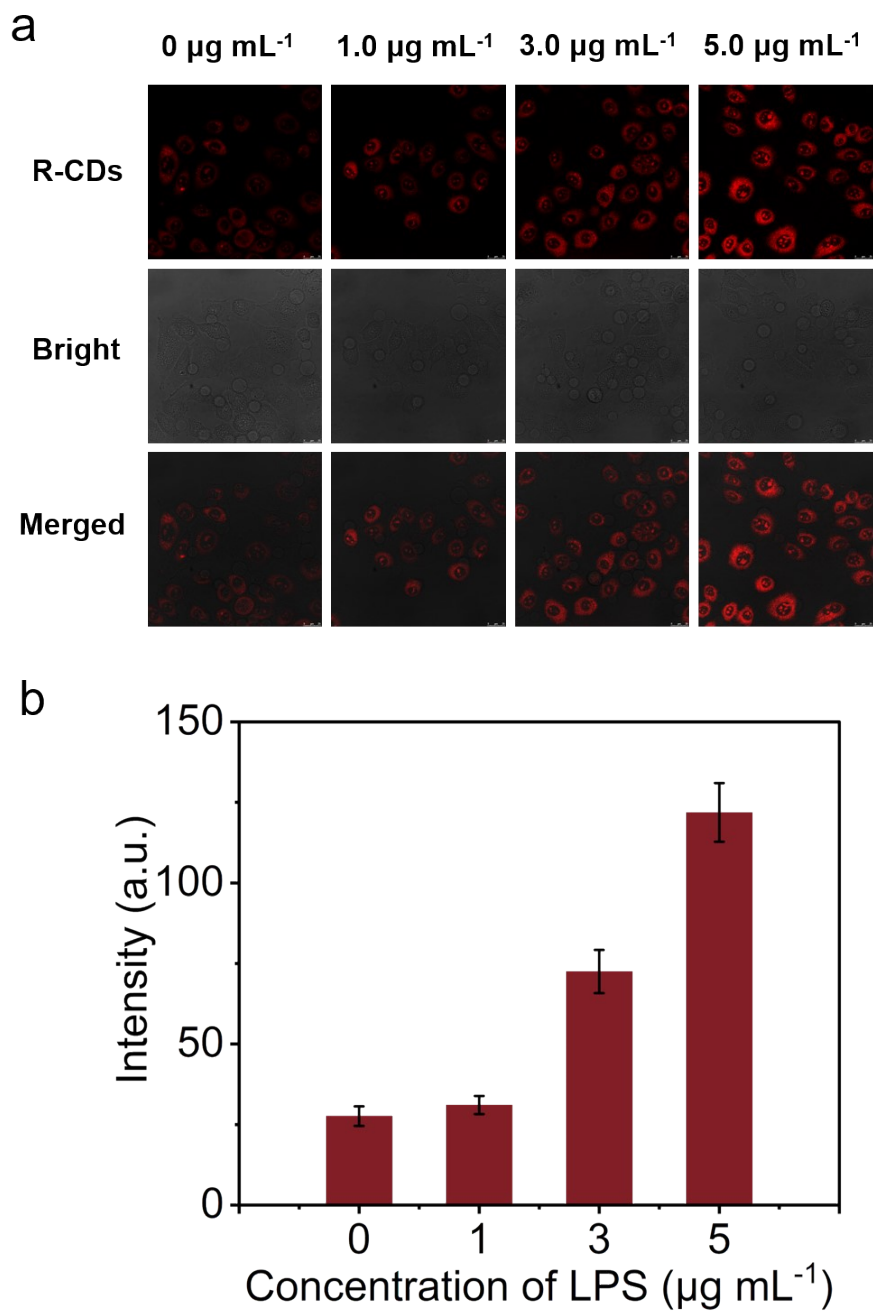

**Figure S7.** (a) The laser scanning confocal microscope images of HeLa cells co-incubated with the R-CDs ( $75 \mu\text{g mL}^{-1}$ ) treated with different concentration of LPS (0, 1, 3, and  $5 \mu\text{g mL}^{-1}$ ). (b) The corresponding average fluorescence intensities from the images in (a). The scale bar is  $25 \mu\text{m}$ .

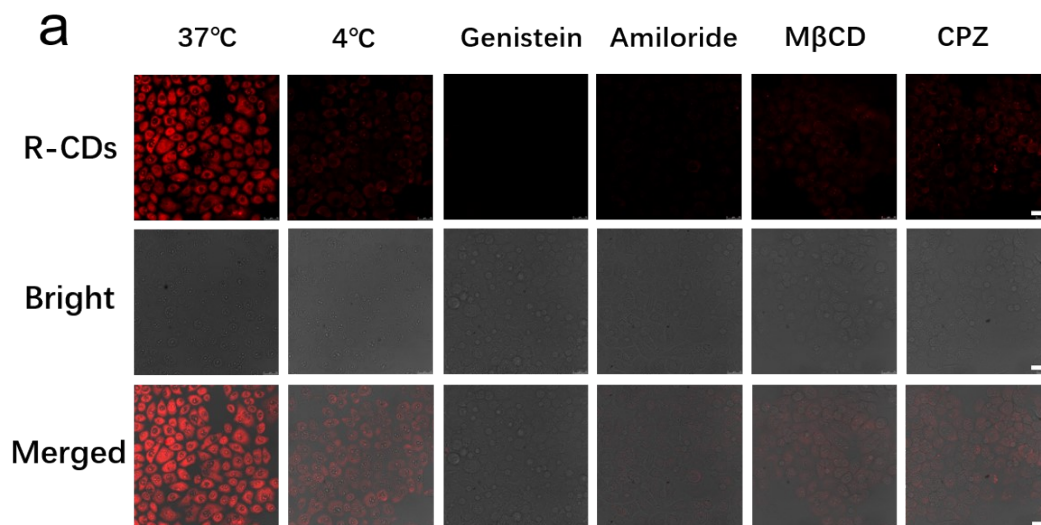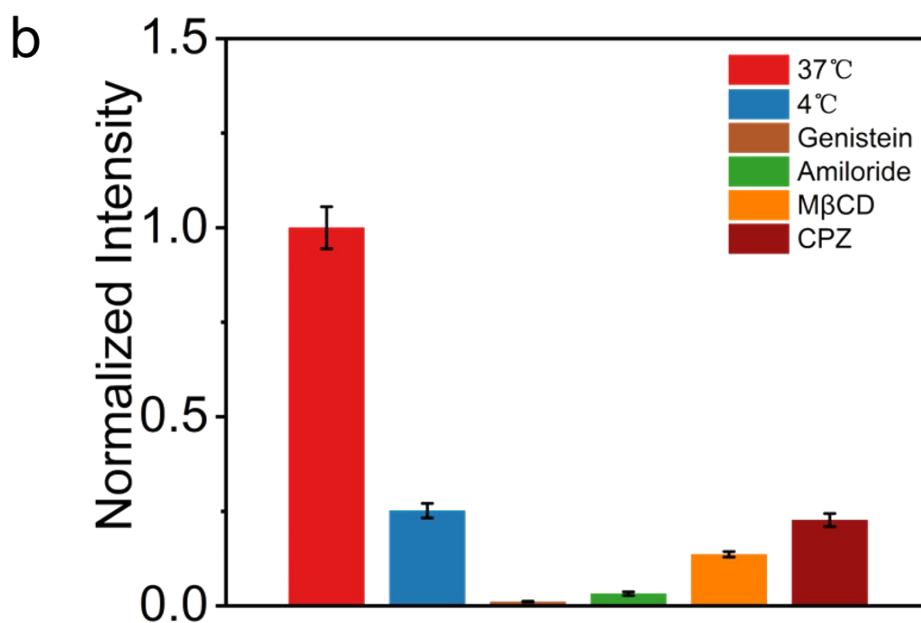

**Figure S8.** (a) Laser scanning confocal microscope images of HeLa cells without or with treatments of inhibitors (4°C, 50  $\mu\text{g mL}^{-1}$  Genistein, 10  $\mu\text{g mL}^{-1}$  Amiloride, 5  $\mu\text{g mL}^{-1}$  M $\beta$ CD, 5  $\mu\text{g mL}^{-1}$  CPZ). (b) The corresponding average fluorescence intensities from the 6 images in (a). The scale bar is 25  $\mu\text{m}$ .

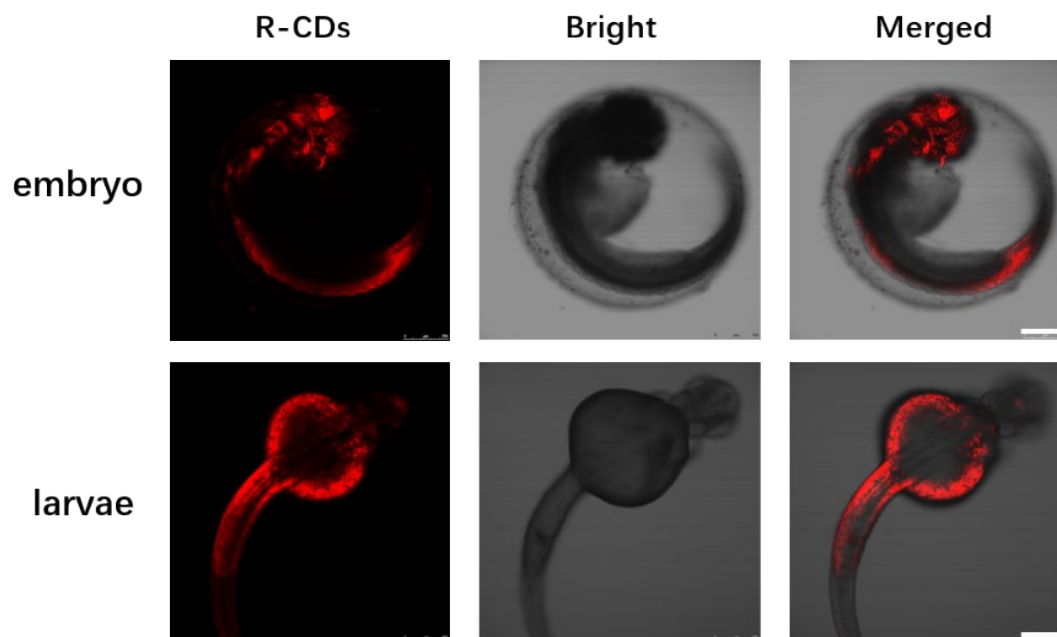

**Figure S9.** Laser scanning confocal microscope images of living zebrafish embryo and zebrafish larvae co-incubated with the R-CDs ( $75 \mu\text{g mL}^{-1}$ ). The scale bar is 0.25 mm.

## References

- 1 K. Holá, M. Sudolská, S. Kalytchuk, D. Nachtigallová, A. L. Rogach, M. Otyepka and R. Zbořil, *ACS Nano*, 2017, **11**, 12402-12410.
- 2 Y. Liu, W. Duan, W. Song, J. Liu, C. Ren, J. Wu, D. Liu and H. Chen, *ACS Appl Mater Interfaces*, 2017, **9**, 12663-12672.
- 3 L. Bao, C. Liu, Z. L. Zhang and D. W. Pang, *Adv Mater*, 2015, **27**, 1663-1667.
- 4 L. Li, L. Shi, J. Jia, O. Eltayeb, W. Lu, Y. Tang, C. Dong and S. Shuang, *ACS Appl Mater Interfaces*, 2020, **12**, 18250-18257.
- 5 X. Miao, D. Qu, D. Yang, B. Nie, Y. Zhao, H. Fan and Z. Sun, *Adv Mater*, 2018, **30**, 1704740.
- 6 L. Jiang, H. Ding, M. Xu, X. Hu, S. Li, M. Zhang, Q. Zhang, Q. Wang, S. Lu, Y. Tian and H. Bi, *Small*, 2020, **16**, e2000680.
- 7 H. Wang, J. Wei, C. Zhang, Y. Zhang, Y. Zhang, L. Li, C. Yu, P. Zhang and J. Chen, *Chinese Chemical Letters*, 2020, **31**, 759-763.
